# Supplementary material for: Dimethyl Fumarate-Loaded Transethosomes: A Formulative Study and Preliminary Ex Vivo and In Vivo Evaluation
Source: MDPI journal article supplement (doi:10.3390/ijms23158756), 2022-08-06
Supplement: s1 [file s1]

# Dimethyl Fumarate-Loaded Transethosomes: A Formulative Study and Preliminary Ex Vivo and In Vivo Evaluations

Francesca Ferrara<sup>1†</sup>, Mascia Benedusi<sup>1†</sup>, Franco Cervellati<sup>1</sup>, Maddalena Sguizzato<sup>2</sup>, Leda Montesi<sup>3</sup>, Agnese Bondi<sup>2</sup>, Markus Drechsler<sup>4</sup>, Walter Pula<sup>2</sup>, Giuseppe Valacchi<sup>\*1,5,6</sup>, and Elisabetta Esposito<sup>\*2</sup>

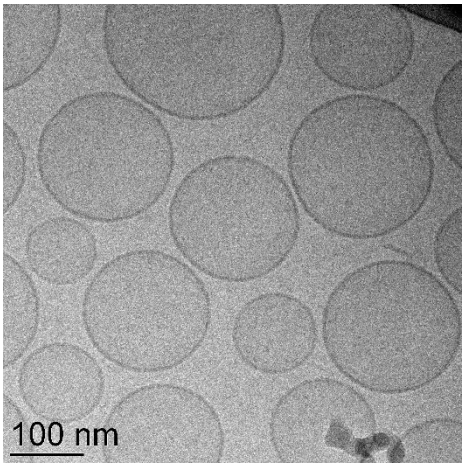

**Figure S1.** Cryo-TEM image of TET<sub>0.9</sub>-DMF50.

**Table S1.** Dimensional distribution parameters of TET<sub>0.9</sub>-DMF50, as determined by using PCS and entrapment capacity (EC).

| Formulation               | Z-Average (nm) | Typical Intensity distribution (nm) | Dispersity index | EC          |
|---------------------------|----------------|-------------------------------------|------------------|-------------|
| TET <sub>0.9</sub> -DMF50 | 140.80 ± 10.50 | 138.43 (100 %)                      | 0.12 ± 0.04      | 100.0 ± 1.1 |

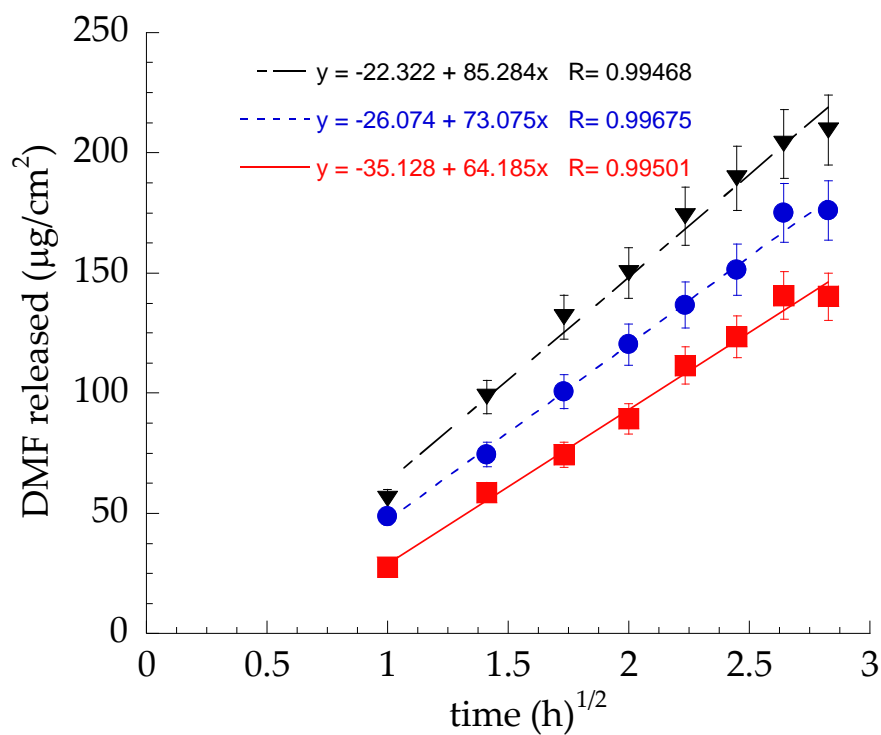

**Figure S2.** Linear part of DMF release kinetics from TET<sub>0.9</sub>-DMF (●), TET<sub>2.7</sub>-DMF (■), and SOL-DMF (▼), as determined by Franz cell associated with PTFE. Data are the mean of 6 independent experiments  $\pm$  s.d.

**Table S2:** IVPT parameters of the indicated forms, as determined by Franz cell associated with Strat-M®.

| IVPT parameters                                                     | TET <sub>0.9</sub> -DMF50 | TET <sub>0.9</sub> -DMF25-gel | TET <sub>0.9</sub> -DMF10-gel |
|---------------------------------------------------------------------|---------------------------|-------------------------------|-------------------------------|
| J <sub>ss</sub> <sup>1</sup> (mg cm <sup>-2</sup> h <sup>-1</sup> ) | 1.62 $\pm$ 0.02           | 0.65 $\pm$ 0.01               | 0.17 $\pm$ 0.02               |
| T <sub>lag</sub> <sup>2</sup> $\pm$ s.d. (h)                        | 0.51 $\pm$ 0.03           | n.p.                          | n.p.                          |
| Kp <sup>3</sup> (cm h <sup>-1</sup> 10 <sup>-3</sup> )              | 32.48 $\pm$ 1.4           | 26.00 $\pm$ 0.51              | 17.00 $\pm$ 0.22              |
| D <sup>4</sup> (cm h <sup>-1</sup> ) $\times$ 10 <sup>-3</sup>      | 0.28 $\pm$ 0.10           | n.d.                          | n.d.                          |
| P <sup>5</sup> <sub>membrane/vehicle</sub>                          | 104.40 $\pm$ 5.41         | n.d.                          | n.d.                          |
| A <sub>DMF</sub> <sup>6</sup> (µg cm <sup>-2</sup> )                | 18.25 $\pm$ 12.5          | 7.50 $\pm$ 1.22               | 2.20 $\pm$ 0.88               |
| M <sub>DMF</sub> <sup>7</sup> (µg cm <sup>-2</sup> )                | 3.20 $\pm$ 0.81           | 1.22 $\pm$ 0.11               | 0.42 $\pm$ 0.13               |

1: Steady-state flux per unit area, 2: lag time; 3: permeability coefficient; 4: diffusion coefficient; 5: partition coefficient; 6: cumulative amount of DMF diffused at 24 h; 7: DMF associated with the membrane after 24 h; n.p.: not present; n.a. not determined; data are the mean of 6 independent Franz cell experiments  $\pm$  s.d. Differences statistically significant,  $p < 0.05$ .
